## **The hourglass model of evolutionary conservation during embryogenesis extends to developmental enhancers with signatures of positive selection**

Jialin Liu<sup>1,2,4</sup>, Rebecca R. Viales<sup>3</sup>, Pierre Khoueiry<sup>3,5</sup>, James P. Reddington<sup>3</sup>, Charles Girardot<sup>3</sup>, Eileen E. M. Furlong<sup>3,\*</sup>, Marc Robinson-Rechavi<sup>1,2,\*</sup>

1. Department of Ecology and Evolution, University of Lausanne, 1015 Lausanne, Switzerland
2. Swiss Institute of Bioinformatics, 1015 Lausanne, Switzerland
3. European Molecular Biology Laboratory, Genome Biology Unit, Heidelberg, Germany
4. Current address: Biozentrum, University of Basel, Basel, Switzerland
5. Current address: American University of Beirut (AUB), Department of Biochemistry and Molecular Genetics, Beirut, Lebanon

\*corresponding authors: [eileen.furlong@embl.org](mailto:eileen.furlong@embl.org), [marc.robinson-rechavi@unil.ch](mailto:marc.robinson-rechavi@unil.ch)

## Abstract

Inter-species comparisons of both morphology and gene expression within a phylum have revealed a period in the middle of embryogenesis with more similarity between species compared to earlier and later time-points. This ‘developmental hourglass’ pattern has been observed in many phyla, yet the evolutionary constraints on gene expression, and underlying mechanisms of how this is regulated, remains elusive. Moreover, the role of positive selection on gene regulation in the more diverged earlier and later stages of embryogenesis remains unknown. Here, using DNase-seq to identify regulatory regions in two distant *Drosophila* species (*D. melanogaster* and *D. virilis*), we assessed the evolutionary conservation and adaptive evolution of enhancers throughout multiple stages of embryogenesis. This revealed a higher proportion of conserved enhancers at the phylotypic period, providing a regulatory basis for the hourglass expression pattern. Using an *in silico* mutagenesis approach, we detect signatures of positive selection on developmental enhancers at early and late stages of embryogenesis, with a depletion at the phylotypic period, suggesting positive selection as one evolutionary mechanism underlying the hourglass pattern of animal evolution.

## Introduction

Embryological development has long been characterized by deep conservation, from morphology to mechanisms. Animals that belong to the same phylum share a group of structural and developmental characteristics, the so called basic body plan or bauplan (Wallace 2000; Valentine 2004; Irie and Kuratani 2014). For example, arthropods share a set of anatomic structures such as jointed legs, an exoskeleton made of chitin, and segmented bodies (Zrzavý and Štys 1997). Based on morphological conservation, Duboule (1994) and Raff (1996) proposed the hourglass model. Under this model, within a phylum, embryos at mid-embryonic stages (the phylotypic period (Richardson 1995)) are morphologically more conserved than embryos in both early and late development. However, this model was not supported by later morphological studies (Richardson et al. 1997; Bininda-Emonds et al. 2003). To overcome difficulties of comparing morphological features across species, more recent studies used comparative transcriptomics (Yanai 2018), as changes in gene expression play a central role in the morphological differences between species (King and Wilson 1975; Carroll 2008).

Transcriptome comparisons in different phyla (Kalinka et al. 2010; Irie and Kuratani 2011; Levin et al. 2012; Hu et al. 2017) indicate that expression divergence is lower in the phylotypic period compared to early and late stages of embryogenesis, supporting the hourglass model. One of the pioneer studies was conducted in six *Drosophila* species by Kalinka et al. (2010), quantifying expression divergence at different stages during embryogenesis. They found that expression divergence follows an hourglass pattern with the minimum divergence at the extended germband stage (8-10 hours after laying egg), generally regarded as part of the arthropod phylotypic period (Sander 1976). Notably, this expression hourglass pattern also extends to the population level (Zalts and Yanai 2017), and even to the level of variation between isogenic individuals (Liu et al. 2020). Based on a single embryo transcriptome time series of *Drosophila* embryonic development, with a high number of isogenic replicates, we found that the phylotypic period also has lower non-genetic expression variability (Liu et al. 2020).

Despite many transcriptomic comparisons, the role of the underlying regulatory regions (e.g. developmental enhancers) on the evolution of expression during embryogenesis remains to be elucidated. What's more, although purifying selection and mutational robustness can explain the hourglass expression divergence pattern (Zalts and Yanai 2017; Liu et al. 2020),

the contribution of positive selection to the hourglass model remains unknown. For example, this pattern may also result from enhanced positive selection at both the early and late development stages. Moreover, the two evolutionary mechanisms (purifying versus positive selection) may not be mutually exclusive. In terms of protein sequence, for example, the lower sequence evolution in the phylotypic period appears to be caused by both strong purifying selection and weak positive selection (Liu and Robinson-Rechavi 2018a; Liu and Robinson-Rechavi 2018b; Coronado-Zamora et al. 2019). To investigate the underlying regulatory mechanisms, and the contribution of positive selection at regulatory elements, to the hourglass model, we performed DNase-seq to identify active regulatory elements across multiple matched embryonic development stages in two distant *Drosophila* species: *D. melanogaster* and *D. virilis*. Overall, we found that regulatory elements are more conserved in the phylotypic period, and less accessible to adaptive evolution. Thus, the phylotypic period can be regarded as an evolutionary regulatory lockdown.

## Results

### DNase-seq across five stages of embryogenesis in two species

To study the evolution of enhancers in the context of embryonic development, we extended our previously published DNase I hypersensitive sites sequencing (DNase-seq) data on three embryonic stages of *D. virilis* and *D. melanogaster* (Peng et al. 2019) to five equivalent embryonic stages (TP1 to TP5, Figure 1A). TP3 is part of the phylotypic period (Figure 1A), with two new time points extended to later stages beyond the phylotypic period. Regulatory regions were identified using DNase I hypersensitive sites sequencing (DNase-seq) in tightly staged whole embryos. Every stage had biological replicates from each species, and high confidence peaks (bound regulatory regions) were called at a 5% Irreproducible Discovery Rate (IDR, a measure ensuring equivalent reproducibility between replicas (Li et al. 2011)). On average, we identified 15,831 peaks in each stage in *D. virilis*, and 14,995 peaks in *D. melanogaster* (Figure S1). Replicates are highly concordant both for raw reads (median Spearman's correlation coefficient 0.96 for *D. virilis*, 0.92 for *D. melanogaster*) and for significant peaks (median Spearman's correlation coefficient = 0.94 for *D. virilis*, 0.90 for *D. melanogaster*). Putative enhancers were defined as peaks greater than 500bp from an annotated transcriptional start site (TSS). For the sake of simplicity, we refer to these putative enhancers simply as enhancers in the rest of the study. We detected more enhancers in *D. virilis* than in *D. melanogaster* (Figure 1B), which may reflect the larger size of its non-coding genome (Khoueiry et al. 2017). In addition, in both species, we found that TP3 has more enhancers than other stages (Figure 1B). The general trend in the relative number of enhancers across development is consistent between the two species.

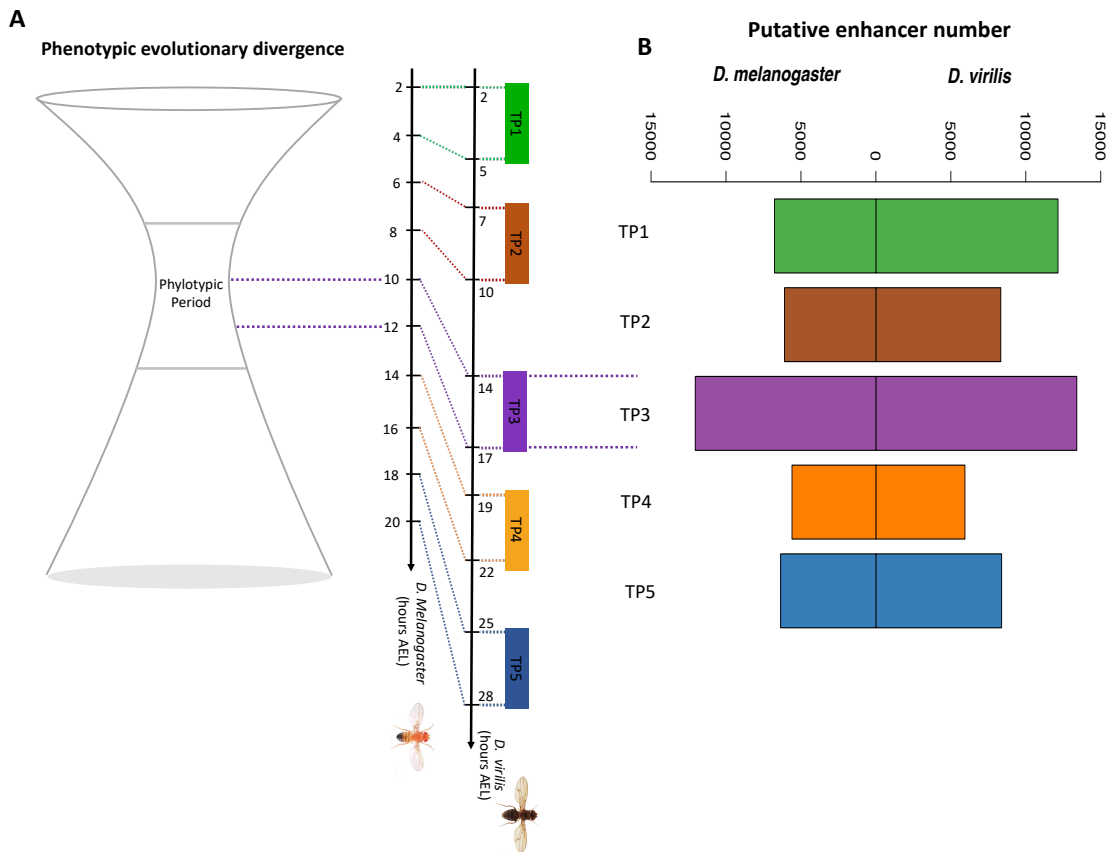

**Figure 1: Studying regulatory elements evolution throughout embryogenesis**

A. We performed DNase-seq at two matched late embryonic development stages in *D. melanogaster* and *D. virilis* (TP4 and TP5) and combined this with our previous DNase I hypersensitive sites (DHS) data (TP1-3) in both species. The corresponding time points (TP1, TP2, TP3, TP4 and TP5) for the five embryonic stages are shown on the developmental axis. Different color bars represent different time points sampled. The developmental axes are scaled in hours after egg laying (AEL).

B. Number of putative enhancers in the five embryonic development stages in each species.

### Enhancer conservation over embryonic development

To compare evolutionary conservation of enhancers between stages, we first identified stage-specific enhancers for each time-point in each species. For example, a *D. melanogaster* TP3 stage-specific enhancer was defined as a DNase peak in this stage with no significant peak at other stages in *D. melanogaster* (Figure 2A; Table 1). For all stage-specific enhancers in one species, we identified their corresponding orthologous regions in the other species with psMap (Zhu et al., 2007) (see Materials and Methods), restricting to one-to-one orthologous regions. In both species, we found that TP3, within the phylotypic period, has a higher proportion of

enhancers with orthologous regions (Figure S2), indicating stronger sequence conservation for phylotypic period-specific enhancers. Next, we identified conserved stage-specific enhancers. For example, if a *D. melanogaster* TP3 specific enhancer not only has an orthologous region, but overlaps (by orthologous translation) with a *D. virilis* TP3 specific enhancer, we defined this as a conserved TP3 specific enhancer (Figure 2A). Finally, to quantify the overall conservation, at each stage, we calculated the Jaccard index (Figure 2B), which ranges from 0 (none of the stage-specific enhancers are conserved) to 1 (all stage-specific enhancers are conserved). We found that TP3 has a significantly higher proportion of conserved enhancers than other stages (Figure 2C). Given the larger size of non-coding genome in *D. virilis*, the genome coordinates of orthologous enhancers can be shifted by insertions and deletions. To account for this, we repeated the analysis with a relaxed definition of conserved enhancer: the distance between stage-specific enhancers in the two species was defined to be smaller than 1kb, but not necessarily overlap. We found a very similar pattern with this more relaxed definition, with higher conserved enhancer proportion at TP3 (Figure 2D).

**Table 1: Number of enhancers for each sampled stage**

|                                                                                                        | TP1  | TP2  | TP3  | TP4 | TP5  |
|--------------------------------------------------------------------------------------------------------|------|------|------|-----|------|
| Stage-specific enhancers <i>D. melanogaster</i>                                                        | 1582 | 549  | 3333 | 677 | 1238 |
| <i>D. virilis</i>                                                                                      | 4765 | 1022 | 3862 | 893 | 2115 |
| Stage-specific enhancers with $\geq 2$ substitutions on the <i>D. melanogaster</i> phylogenetic branch | 1467 | 521  | 3198 | 657 | 1216 |

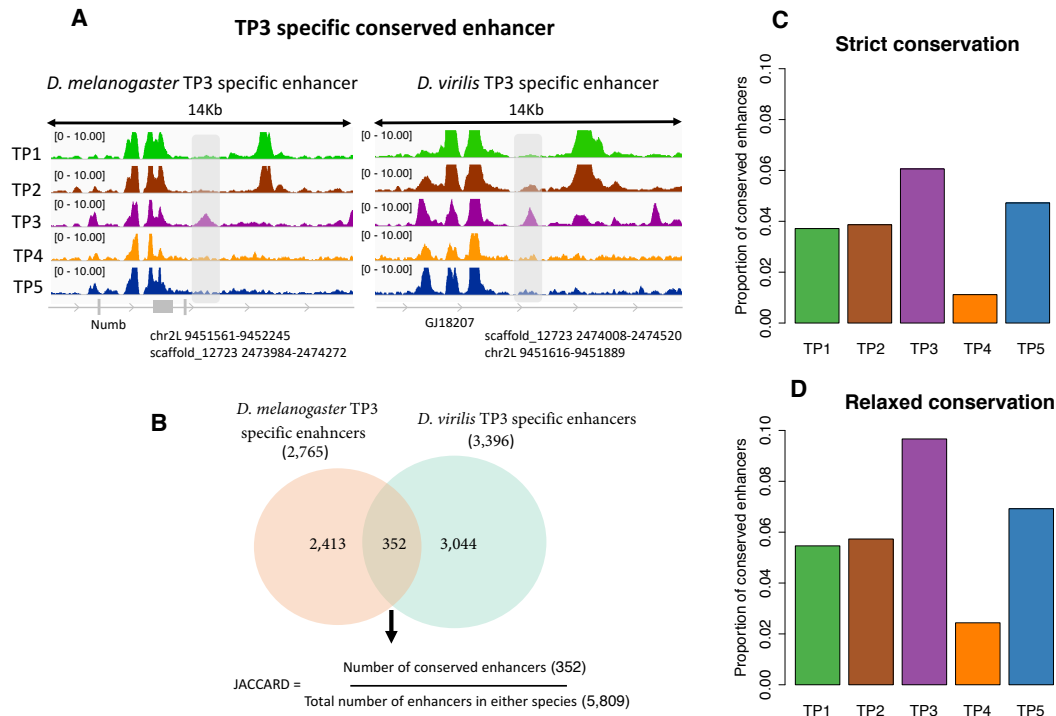

**Figure 2: The phylotypic period has a higher proportion of conserved regulatory elements**

- A. Illustration of a TP3 specific conserved enhancer. The left panel is the DNase-seq signal in different development stages (TP1, TP2, TP3, TP4 and TP5) for a *D. melanogaster* TP3 specific enhancer, covered by the grey area. The coordinates of this enhancer in *D. melanogaster*, and the orthologous coordinates in *D. virilis*, are indicated below the grey arrow. The right panel is the DNase-seq signals in different development stages (TP1, TP2, TP3, TP4 and TP5) for a *D. virilis* TP3 specific enhancer, covered by the grey area. The coordinates of this enhancer in *D. virilis*, and the orthologous coordinates in *D. melanogaster*, are illustrated below the grey arrow. Since there is overlap between the *D. melanogaster* TP3 specific enhancer and the *D. virilis* TP3 specific enhancer based on orthologous position, we define the two enhancers as a TP3 conserved enhancer.
- B. Venn diagram of orthologous TP3 specific enhancers (only one-to-one orthologs) conserved between both species.
- C. Proportion of conserved stage-specific enhancers at each development stage. Here the conservation means there is at least 1bp overlap between stage-specific enhancers in the two species. The p-values from pairwise Fisher's exact tests between TP3 and TP1, TP2, TP4, and TP5 are  $6.51e-07$ ,  $3.69e-03$ ,  $1.44e-14$ ,  $2.22e-02$  respectively.
- D. Proportion of conserved stage-specific enhancers at each development stage. Here the conservation means the distance between stage-specific enhancers in the two species must



be smaller than 1kb, not necessarily overlap. The *p*-values from pairwise Fisher's exact tests between TP3 and TP1, TP2, TP3, TP4 are 1.89e-12, 4.28e-05, 2.7e-17, 2.25e-04 respectively.

### **Detecting positive selection on enhancers**

Higher conservation can be explained either by stronger purifying selection or by weaker positive selection. To test for the latter, we scanned for signatures of positive selection in all *D. melanogaster* stage-specific enhancers. Our approach considers the effects of substitutions on enhancer regulatory activity, and is derived from a new method to detect positive selection in transcription factor binding site evolution (Liu and Robinson-Rechavi 2020). The method is based on machine learning of the sequence patterns associated to function. Substitutions are then scored according to their impact on this function, and regions which have evolved differently than a random expectation are candidates for selection. Here the function is stage-specific enhancers, and we first defined whether there were sequence features which differ between enhancers of different stages. As this positive selection scanning method needs to be applied to sequences with relatively low divergence, we tested for substitutions on the *D. melanogaster* branch after divergence from *D. simulans* (Figure 3A), rather than the much more distant *D. virilis* branch.

To identify sequence features within enhancer elements that determine their developmental stage-specific occupancy, we first separately trained a gapped *k*-mer support vector machine (gkm-SVM) for each stage (see Materials and Methods). This gkm-SVM identifies sequence features that determine chromatin accessibility, thus enhancer occupancy, in the corresponding developmental stage. Not only can the gkm-SVM trained in the corresponding stage accurately distinguish enhancers from random sequences, it also has higher performance than the gkm-SVM trained from other stages. (Figure 3B, see Materials and Methods). In addition, a gkm-SVM trained from an adjacent stage has higher performance than a gkm-SVM trained from a distant stage. For example, the gkm-SVM model trained from TP2 has higher power to distinguish TP1 specific enhancers from

random sequences than the gkm-SVM model trained from TP5. These results suggest that the gkm-SVM's predictions are not only informative, but also developmental stage specific.

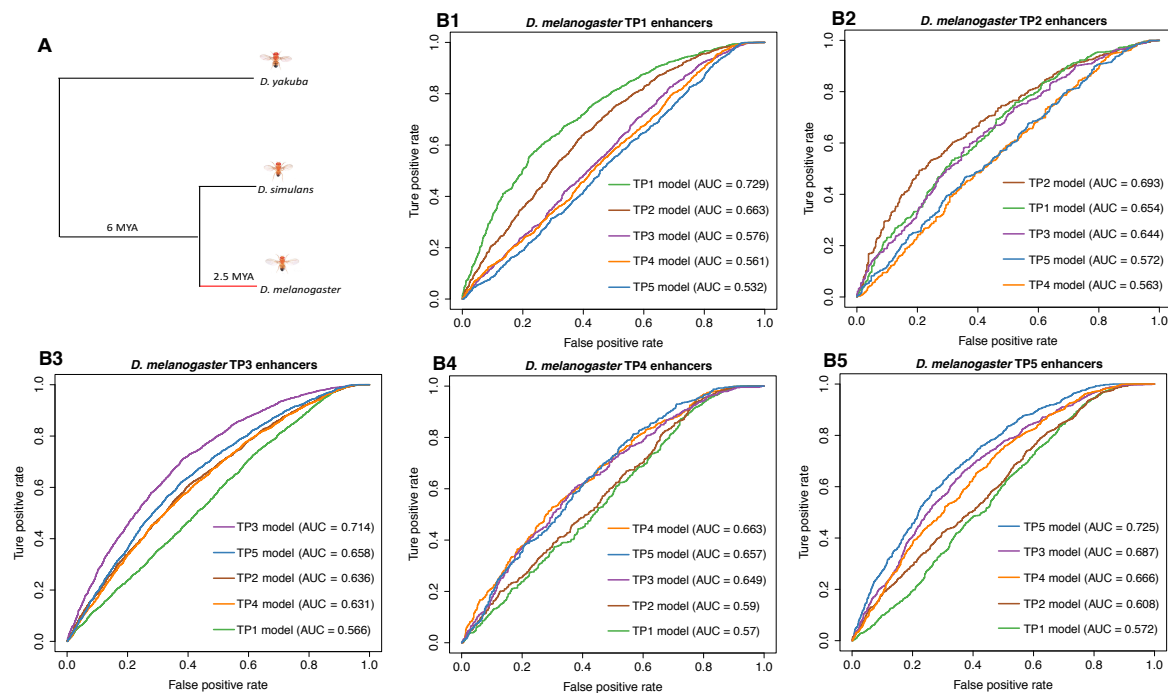

**Figure 3: Gapped k-mer support vector machine (gkm-SVM) can predict stage-specific enhancers**

A. Topological illustration of the phylogenetic relationships between the three *Drosophila* species used to detect positive selection on enhancers. We want to detect positive selection which occurred on the lineage of *D. melanogaster* after divergence from *D. simulans*, as indicated by the red branch. *D. yakuba* is the outgroup used to infer enhancer sequence in the ancestor of *D. melanogaster* and *D. simulans*.

B1-5. Receiver operating characteristic (ROC) curves for gkm-SVM classification performance on stage-specific enhancers. AUC values represent areas under the ROC curve and provide an overall measure of predictive power.

We only kept enhancers with at least two substitutions to their sequence between species (Table 1). For each enhancer, we calculated a deltaSVM score, which estimates the effect of substitutions on the gkm-SVM function score. This can be interpreted as the effect of these sequence substitutions on chromatin accessibility change. We associated a *p*-value for each enhancer, by *in silico* mutagenesis (see Materials and Methods). Thus, we can identify enhancers whose substitution pattern on the *D. melanogaster* branch has effects on chromatin

accessibility which are inconsistent with neutrality, and therefore imply positive selection on enhancers.

In each stage, the distributions of  $p$ -values for all stage-specific enhancers shows a strong skew toward low  $p$ -values (Figure 4A), indicating evidence for positive selection. For all downstream analyses, we use  $q < 0.05$  (i.e. 5% false positives) as a threshold to define an enhancer as having evolved under positive selection (hereafter "positive selection enhancer"). Since mutations under positive selection will spread through a population rapidly, they are expected to decrease polymorphisms (intra-species variation) while increasing substitutions (inter-species variation) (McDonald and Kreitman 1991). Thus, we expect that positive selection enhancers should have higher substitutions to polymorphisms ratios than non-positive selection enhancers. To test this, we counted the number of substitutions between *D. melanogaster* and *D. simulans*, and number of polymorphisms among 205 *D. melanogaster* inbred lines from wild isolates, separately for positive selection and non-positive selection enhancers (see Materials and Methods). As predicted, in all stages, positive selection enhancers have a significant excesses of fixed nucleotide changes (Figure 4B), confirming that we are indeed detecting positive selection in enhancer evolution.

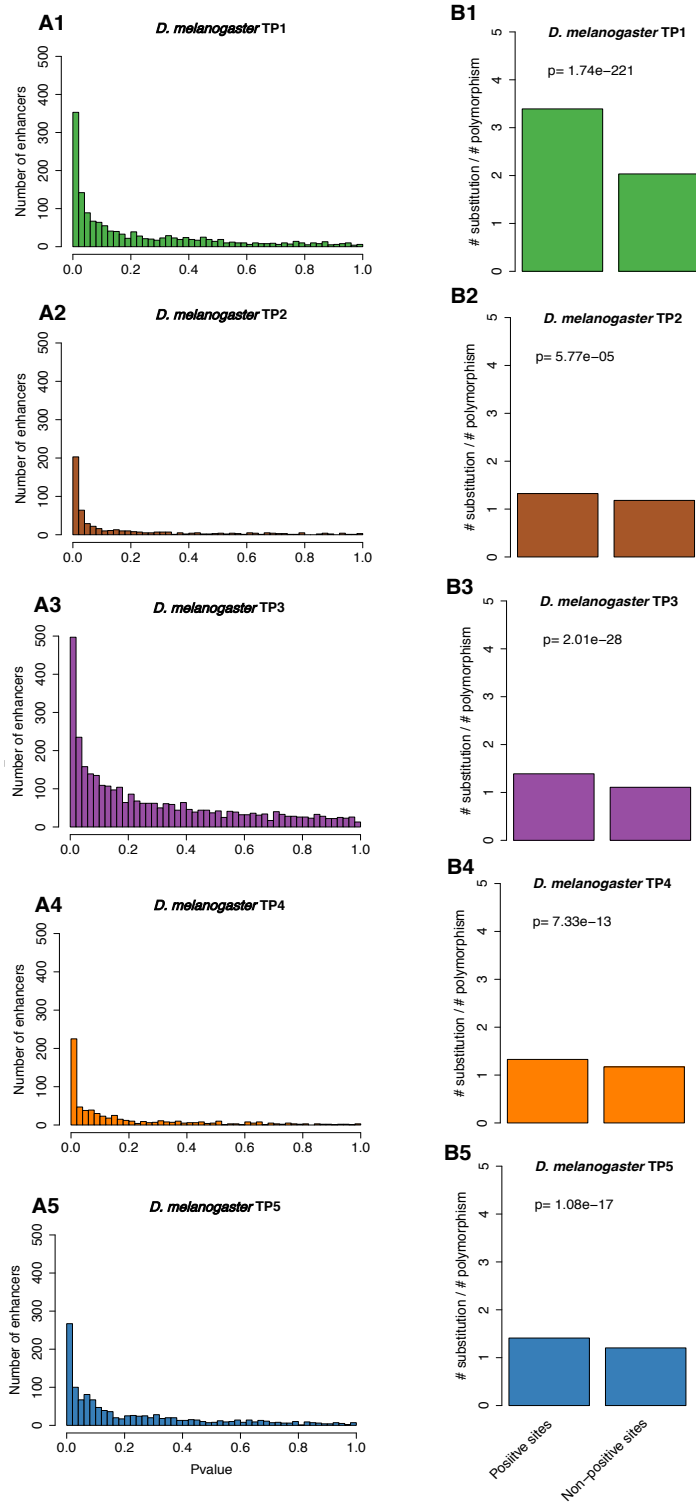

**Figure 4: Evidence of positive selection throughout embryogenesis**

A1-5. The distribution of deltaSVM p-values (test for positive selection) for each stage-specific enhancer.

B1-5. The ratio between the number of substitutions and the number of polymorphisms (SNPs) for each stage-specific enhancers. Positive sites are enhancers with evidence of positive

selection (*deltaSVM* *qvalue* < 0.05), non-positive sites are enhancers without evidence of positive selection. The *p*-value from Fisher's exact test is reported above the bars.

Having identified enhancers which evolved under positive selection, we investigated whether their distribution varies across development. We previously found that species specific gains in transcription factor binding sites have a higher proportion of positive selection than conserved ones (Liu and Robinson-Rechavi 2020). Thus, we separated *D. melanogaster* enhancers into conserved and non-conserved enhancers, based on conservation with *D. virilis* enhancers. As expected, the non-conserved enhancers generally have a higher proportion of positive selection than the conserved ones (Figure 5). Moreover, over development, the phylotypic period has a much lower proportion of enhancers with evidence of positive selection than the other stages (Figure 5). This suggests that positive selection contributes to the evolution of enhancers, and that the phylotypic period is characterized by less positive selection.

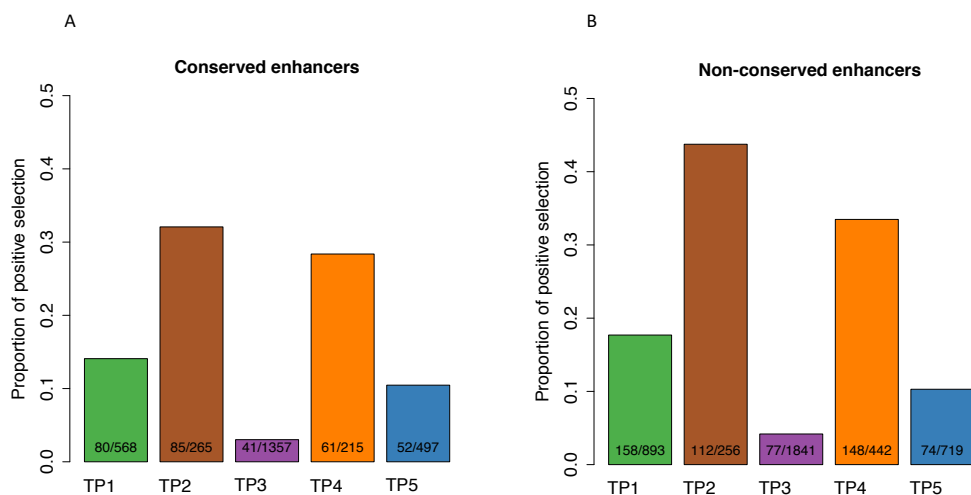

**Figure 5: The phylotypic period has a lower proportion of enhancers with evidence of positive selection**

The proportion of enhancers with evidence of positive selection in the five stages. Positive sites are enhancers with evidence of positive selection (*deltaSVM* *qvalue* < 0.05). The number of stage-specific enhancers and the number of stage-specific enhancers with evidence of positive selection in each development stage is indicated inside each bar.

A. The *p*-values from pairwise Fisher's exact tests between TP3 and TP1, TP2, TP4, TP5 are  $1.08e-15$ ,  $1.01e-33$ ,  $6.75e-25$ ,  $9.94e-09$  respectively.

*B. The p-values from pairwise Fisher's exact tests between TP3 and TP1, TP2, TP4, TP5 are 5.04e-25, 1.47e-46, 4.57e-46, 1.64e-07 respectively.*

To check whether our test could be biased by mutation patterns, we analyzed the rates of all possible substitutions and their corresponding deltaSVM (Liu and Robinson-Rechavi 2020), in each development stage. We split all substitutions into two categories: substitutions on CpG, and substitutions not on CpG. Overall, as expected, we found that the transition rate is much higher than the transversion rate, but we didn't find any trend for specific substitution types to strengthen or weaken deltaSVM (Figure S3-7). We also checked whether neighboring substitutions (dinucleotide substitutions) have a general tendency to change deltaSVM in the same direction. Indeed, this is the case (Figure S8), suggesting that our test could be liberal or conservative for dinucleotide substitutions, depending on the direction of deltaSVM. Finally, to check whether dinucleotide substitutions and mutation bias affect the pattern we found, we excluded dinucleotide substitution sequences from all binding sites, and we integrated the transition and transversion rate (3:1, estimated from Figure S3-7) into our null model. With these controls, we found a very consistent pattern to the original analysis (Figure S9). Thus our results are robust to the main known mutational biases.

## Discussion

Based on DNase I hypersensitive sites (DHS) in two distant *Drosophila* species across multiple matched embryonic stages, we identified a set of highly conserved stage-specific developmental enhancers. There is a higher proportion of conserved enhancers at the phylotypic period than at other embryonic stages, suggesting that conserved expression in the phylotypic period can be at least partly explained by conservation in gene regulation (Figure 6). This provides a regulatory basis for the hourglass expression pattern. While enhancer conservation can be due to stronger purifying selection, it can also result from weaker positive selection. Here, for the first time, we provide evidence that the higher enhancer conservation at the phylotypic period can be explained in part by the latter (Figure 6). This is consistent with similar results at the protein sequence level (Liu and Robinson-Rechavi 2018b; Coronado-Zamora et al. 2019).

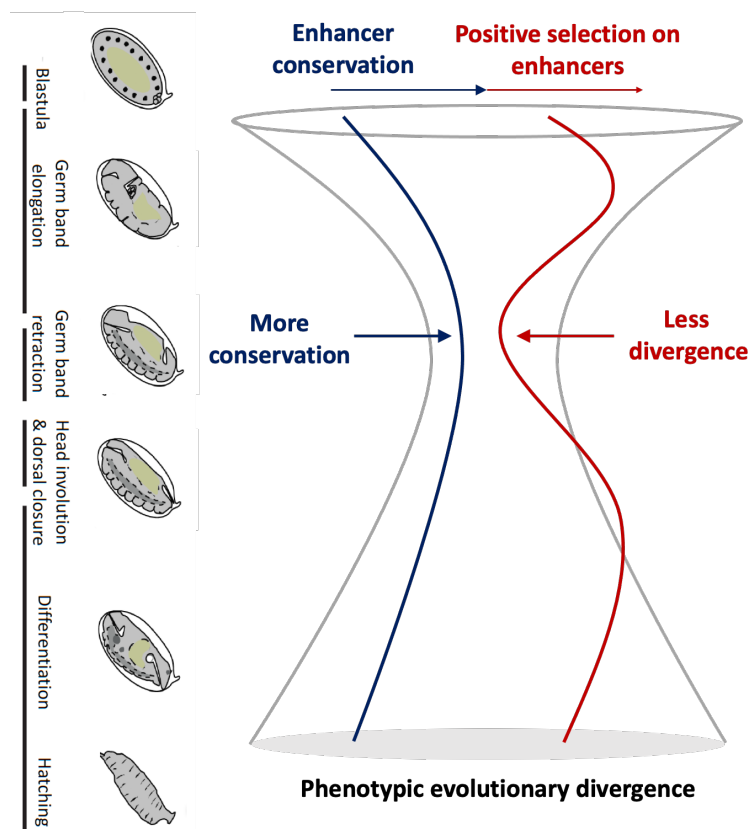

**Figure 6: A simple model of the evolutionary forces on gene regulation for the hourglass pattern**

Embryo images of *D. melanogaster* adapted from Levin et al. (2016).

Our results indicate that widespread positive selection shaped the evolution of developmental enhancers, especially of early and late embryonic enhancers. Higher adaptation in late embryonic stages could be due to the greater diversity of challenges to which natural selection needs to respond in the next stages of larva and juvenile development, compared to early and mid-embryogenesis. This fits with Darwin's "selection opportunity" (Liu and Robinson-Rechavi 2018b). Adaptation in the early embryo is less expected. Whereas early developmental proteins are influenced by the maternal contribution, which could be impacted by selection on reproduction, early embryonic enhancers are specific to the zygote. While there is evidence that the evolution of *cis*-regulatory elements is the main driver of morphologic diversity (Gompel et al. 2005; McGregor et al. 2007; Wray 2007; Jeong et al. 2008), for most changes in early embryogenesis there are no clear consequences on adult morphology (Kalinka and Tomancak 2012). This raises the question of why there are so many adaptive enhancer changes in early embryogenesis. One explanation, proposed by Kalinka and Tomancak (2012), is that much of the variation in early embryogenesis results from adaptation to diverse ecological circumstances. For example the evolution of long germ segmentation in some insects (Liu and Kaufman 2005) might play a role in shortening the embryonic development time, which is likely an adaptive strategy to a particular ecological niches (Kalinka and Tomancak 2012). Another explanation is that adaptive evolution of maternally contributed trans factors might drive rapid compensatory evolution of early zygotic enhancers.

While we show a role of lower adaptive evolution of regulation in more conserved expression at the phylotypic period, several recent studies also found evidence of developmental constraints, both purifying selection and mutational robustness. For example, in order to mostly eliminate the influence of positive selection on gene expression evolution, Zalts and Yanai (2017) quantified expression variability of 20 *C. elegans* mutation accumulation strains throughout embryogenesis. They found that the nematode phylotypic period has lower expression variability, indicating that purifying selection can contribute to the hourglass model of expression evolution. These results are also compatible with a role of mutational robustness. In *D. melanogaster*, we have recently compared the expression variability of isogenic single embryo transcriptomes across development and found lower variability at the phylotypic period, suggesting that genes expressed at this stage are intrinsically less sensitive to perturbations on gene expression (Liu et al. 2020). Here, we found a much higher number of enhancers at the phylotypic period, which suggests more redundancy and thus higher regulatory robustness in gene expression. This could also contribute to mutational robustness



(Cannavò et al. 2016) and thus lower expression divergence. Overall, the low expression divergence at the phylotypic period seems to have been shaped by the interplay of purifying selection, positive selection, and mutational robustness.

## References

- Afgan E, Baker D, Batut B, Van Den Beek M, Bouvier D, Ech M, Chilton J, Clements D, Coraor N, Grüning BA, et al. 2018. The Galaxy platform for accessible, reproducible and collaborative biomedical analyses: 2018 update. *Nucleic Acids Res.* 46:W537–W544.
- Bininda-Emonds ORP, Jeffery JE, Richardson MK. 2003. Inverting the hourglass: quantitative evidence against the phylotypic stage in vertebrate development. *Proc. Biol. Sci.* 270:341–346.
- Bolger AM, Lohse M, Usadel B. 2014. Trimmomatic: A flexible trimmer for Illumina sequence data. *Bioinformatics* 30:2114–2120.
- Cannavò E, Khoueiry P, Garfield DA, Geeleher P, Zichner T, Gustafson EH, Ciglar L, Korbel JO, Furlong EEM. 2016. Shadow Enhancers Are Pervasive Features of Developmental Regulatory Networks. *Curr. Biol.* 26:38–51.
- Carroll SB. 2008. Evo-Devo and an Expanding Evolutionary Synthesis: A Genetic Theory of Morphological Evolution. *Cell* 134:25–36.
- Coronado-Zamora M, Salvador-Martínez I, Castellano D, Barbadilla A, Salazar-Ciudad I. 2019. Adaptation and Conservation throughout the *Drosophila melanogaster* Life-Cycle. *Genome Biol. Evol.* 11:1463–1482.
- Duboule D. 1994. Temporal colinearity and the phylotypic progression: a basis for the stability of a vertebrate Bauplan and the evolution of morphologies through heterochrony. *Development* 1994:135–142.
- Ghandi M, Lee D, Mohammad-Noori M, Beer MA. 2014. Enhanced Regulatory Sequence Prediction Using Gapped k-mer Features. *PLoS Comput. Biol.* 10:e1003711.
- Ghandi M, Mohammad-Noori M, Ghareghani N, Lee D, Garraway L, Beer MA. 2016. gkmSVM: an R package for gapped-kmer SVM. *Bioinformatics* 32:2205–2207.
- Gompel N, Prud'homme B, Wittkopp PJ, Kassner VA, Carroll SB. 2005. Chance caught on the wing: cis-regulatory evolution and the origin of pigment patterns in *Drosophila*. *Nature* 433:481–487.
- Haeussler M, Zweig AS, Tyner C, Speir ML, Rosenbloom KR, Raney BJ, Lee CM, Lee BT, Hinrichs AS, Gonzalez JN, et al. 2019. The UCSC Genome Browser database: 2019 update. *Nucleic Acids Res.* 47:D853–D858.
- Hu H, Uesaka M, Guo S, Shimai K, Lu T-M, Li F, Fujimoto S, Ishikawa M, Liu S, Sasagawa Y, et al. 2017. Constrained vertebrate evolution by pleiotropic genes. *Nat. Ecol. Evol.* 1:1722–1730.
- Huang W, Massouras A, Inoue Y, Peiffer J, Ràmia M, Tarone AM, Turlapati L, Zichner T, Zhu D, Lyman RF, et al. 2014. Natural variation in genome architecture among 205 *Drosophila melanogaster* Genetic Reference Panel lines. *Genome Res.* 24:1193–1208.
- Irie N, Kuratani S. 2011. Comparative transcriptome analysis reveals vertebrate phylotypic period during organogenesis. *Nat. Commun.* 2:248.
- Irie N, Kuratani S. 2014. The developmental hourglass model: a predictor of the basic body plan? *Development* 141:4649–4655.
- Jeong S, Rebeiz M, Andolfatto P, Werner T, True J, Carroll SB. 2008. The Evolution of Gene Regulation Underlies a Morphological Difference between Two *Drosophila* Sister Species. *Cell* 132:783–793.
- Kalinka AT, Tomancak P. 2012. The evolution of early animal embryos: conservation or divergence? *Trends Ecol. Evol.* 27:385–393.
- Kalinka AT, Varga KM, Gerrard DT, Preibisch S, Corcoran DL, Jarrells J, Ohler U, Bergman CM, Tomancak P. 2010. Gene expression divergence recapitulates the developmental hourglass model. *Nature* 468:811–814.
- Khoueiry P, Girardot C, Ciglar L, Peng P-C, Gustafson EH, Sinha S, Furlong EE. 2017.

- Uncoupling evolutionary changes in DNA sequence, transcription factor occupancy and enhancer activity. *Elife* 6.
- King MC, Wilson AC. 1975. Evolution at two levels in humans and chimpanzees. *Science* 188:107–116.
- Langmead B, Salzberg SL. 2012. Fast gapped-read alignment with Bowtie 2. *Nat. Methods* 9:357–359.
- Lee D. 2016. LS-GKM: a new gkm-SVM for large-scale datasets. *Bioinformatics* 32:2196–2198.
- Lee D, Gorkin DU, Baker M, Strober BJ, Asoni AL, McCallion AS, Beer MA. 2015. A method to predict the impact of regulatory variants from DNA sequence. *Nat. Genet.* 47:955–961.
- Levin M, Anavy L, Cole AG, Winter E, Mostov N, Khair S, Senderovich N, Kovalev E, Silver DH, Feder M, et al. 2016. The mid-developmental transition and the evolution of animal body plans. *Nature* 531:637–641.
- Levin M, Hashimshony T, Wagner F, Yanai I. 2012. Developmental milestones punctuate gene expression in the *Caenorhabditis* embryo. *Dev. Cell* 22:1101–1108.
- Li Q, Brown JB, Huang H, Bickel PJ. 2011. Measuring reproducibility of high-throughput experiments. *Ann. Appl. Stat.* 5:1752–1779.
- Liu J, Frochoux M, Gardeux V, Deplancke B, Robinson-Rechavi M. 2020. Inter-embryo gene expression variability recapitulates the hourglass pattern of evo-devo. *BMC Biol.* 18:129.
- Liu J, Robinson-Rechavi M. 2018a. Developmental Constraints on Genome Evolution in Four Bilaterian Model Species. *Genome Biol. Evol.* 10:2266–2277.
- Liu J, Robinson-Rechavi M. 2018b. Adaptive Evolution of Animal Proteins over Development: Support for the Darwin Selection Opportunity Hypothesis of Evo-Devo. *Mol. Biol. Evol.* 35:2862–2872.
- Liu J, Robinson-Rechavi M. 2020. Robust inference of positive selection on regulatory sequences in human brain. *bioRxiv*. <https://doi.org/10.1101/2020.03.09.984047>.
- Liu PZ, Kaufman TC. 2005. Short and long germ segmentation: unanswered questions in the evolution of a developmental mode. *Evol. Dev.* 7:629–646.
- McDonald JH, Kreitman M. 1991. Adaptive protein evolution at the *Adh* locus in *Drosophila*. *Nature* 351:652–654.
- McGregor AP, Orgogozo V, Delon I, Zanet J, Srinivasan DG, Payre F, Stern DL. 2007. Morphological evolution through multiple cis-regulatory mutations at a single gene. *Nature* 448:587–590.
- Peng P-C, Khoueiry P, Girardot C, Reddington JP, Garfield DA, Furlong EEM, Sinha S. 2019. The Role of Chromatin Accessibility in cis-Regulatory Evolution. *Genome Biol. Evol.* 11:1813–1828.
- Raff RA. 1996. *The shape of life : genes, development, and the evolution of animal form.* University of Chicago Press.
- Richardson MK. 1995. Heterochrony and the phylotypic period. *Dev. Biol.* 172:412–421.
- Richardson MK, Hanken J, Gooneratne ML, Pieau C, Raynaud A, Selwood L, Wright GM. 1997. There is no highly conserved embryonic stage in the vertebrates: implications for current theories of evolution and development. *Anat. Embryol. (Berl)*. 196:91–106.
- Sander K. 1976. Specification of the Basic Body Pattern in Insect Embryogenesis. *Adv. In Insect Phys.* 12:125–238.
- Valentine JW. 2004. *On the origin of phyla.* University of Chicago Press
- Wallace A. 2000. *The origin of animal body plans : a study in evolutionary developmental biology.* Cambridge University Press
- Wray GA. 2007. The evolutionary significance of cis-regulatory mutations. *Nat. Rev. Genet.* 8:206–216.
- Yanai I. 2018. *Development and Evolution through the Lens of Global Gene Regulation.*

- Trends Genet. 34:11–20.
- Zalts H, Yanai I. 2017. Developmental constraints shape the evolution of the nematode mid-developmental transition. *Nat. Ecol. Evol.* 1:0113.
- Zhang Y, Liu T, Meyer CA, Eeckhoute J, Johnson DS, Bernstein BE, Nussbaum C, Myers RM, Brown M, Li W, et al. 2008. Model-based Analysis of ChIP-Seq (MACS). *Genome Biol.* 9:R137.
- Zhu J, Sanborn JZ, Diekhans M, Lowe CB, Pringle TH, Haussler D. 2007. Comparative Genomics Search for Losses of Long-Established Genes on the Human Lineage. *PLoS Comput. Biol.* 3:e247.
- Zrzavý J, Štys P. 1997. The basic body plan of arthropods: insights from evolutionary morphology and developmental biology. *J. Evol. Biol.* 10: 653-367.

## Materials and Methods

### Availability of code

Data files and analysis scripts are available on GitHub:

<https://github.com/ljljolinq1010/Chromatin-accessibility-evolution-during-Drosophila-embryogenesis>

### Availability of data

DNase-seq data was deposited to EMBL-EBI ArrayExpress – the first three time-points published by Peng et al. (2019) with accession number E-MTAB-3797 (*D. melanogaster* and *D. virilis* DNase developmental time course) and the new data for the last two time points in each species with accession number E-MTAB-9480.

### DNase-seq on *D. melanogaster* and *D. virilis* embryos

The first three time-points were from our published study (Peng et al. 2019). Here we supplemented those by two additional time-points in each species to extend our time-course beyond the phylotypic period (Figure 1A). Stage matched *D. melanogaster* and *D. virilis* embryos (stages defined by Khoueiry et al. (2017)) were collected and DNase-seq performed as described previously (Khoueiry et al. 2017).

### DNase-seq sample processing

All analysis were performed in the Galaxy platform (Afgan et al. 2018). Raw paired-end reads were first trimmed with Trim Galore (<https://github.com/FelixKrueger/TrimGalore>, Galaxy Tool Version 0.4.3.1) and reads were clipped to maximum of 94 bases using Trimmomatic (Bolger et al. 2014) (Galaxy Tool Version 0.36.6). Then the trimmed reads were mapped to the *D. melanogaster* genome (Flybase Assembly 6 version: dm6) and to the *D. virilis* genome (Flybase-R1.2 assembly version: droVir3) respectively by using Bowtie2 (Langmead and Salzberg 2012) with standard parameters (Galaxy Tool Version 2.3.4.2). Multi-mapping reads were discarded and duplicates were removed using MarkDuplicates (Galaxy Tool Version 2.7.1.1) from the Picard suite <https://github.com/broadinstitute/picard>. For peak calling, we used MACS2 (Zhang et al. 2008) with standard parameters (MACS2 Galaxy Tool Version 2.1.1.20160309.5). We derived peaks using 5% Irreproducible Discovery Rate (IDR, Galaxy Tool Version 2.0.3) threshold for biological replicates.

### **Genome coordinates translation**

Since *D. melanogaster* and *D. virilis* are highly divergent, the *D. virilis* (*D. melanogaster*) peak coordinates were translated to *D. melanogaster* (*D. virilis*) genome coordinates by using the pslMap (Zhu et al. 2007), as suggested by Khoueiry et al. (2017).

### **Sequence alignment files**

The pairwise whole genome alignments between *D. melanogaster* and *D. simulans* or *D. yakuba* were downloaded from Haeussler et al. (2019) <http://hgdownload.soe.ucsc.edu/downloads.html> (accessed in December, 2018).

### **Single Nucleotide Polymorphism (SNP) data**

Over 4.8 million SNPs for 205 *D. melanogaster* inbred lines were downloaded from the Drosophila Genetic Reference Panel (DGRP) <http://dgrp2.gnets.ncsu.edu/> (Huang et al. 2014, accessed in December, 2018).

### **In silico mutagenesis for detecting positive selection on enhancers**

#### 1. Training the gapped k-mer support vector machine (gkm-SVM)

gkm-SVM is a method for predicting regulatory DNA sequence by using *k*-mer frequencies (Ghandi et al. 2014). For the gkm-SVM training, we followed the same approaches as Lee et al. (2015). Firstly, we defined a positive training set and its corresponding negative training set. The positive training set is stage-specific enhancers. The negative training set is an equal number of sequences randomly sampled from the genome with matched length, GC content and repeat fraction as in the positive training set. This negative training set was generated by using “genNullSeqs”, a function of the gkm-SVM R package (Ghandi et al. 2016). Then, we trained a gkm-SVM with default parameters except  $-l=10$  (meaning we use 10-mers as feature to distinguish positive and negative training sets). The classification performance of the trained gkm-SVM was measured by using receiver operating characteristic (ROC) curves with fivefold cross-validation. The gkm-SVM training and cross-validation were achieved by using the “gkmtrain” function of “LS-GKM” (Lee 2016) (also see <https://github.com/Dongwon-Lee/lsgkm>).

#### 2. Testing the stage specificity of gkm-SVM

To test the performance of gkm-SVM trained in stages other than the focal stage (e.g., trained TP2, TP3, TP4, TP5 to predict in TP1), we first scored both positive and negative training sets

in the focal stage by using the gkm-SVM from other stages. We used the “gkmpredict” function of “LS-GKM”. Then, the ROC curve was used to evaluate the prediction performance.

### 3. Generating SVM weights of all possible 10-mers

The SVM weights of all possible 10-mers were generated with the “gkmpredict” function of “LS-GKM”. A positive value means increasing chromatin accessibility, a negative value means decreasing accessibility, and value close to 0 means no impact on chromatin accessibility (the function measured in this case).

### 4. Inferring ancestor sequence

The ancestor sequence was inferred from sequence alignment between *D. melanogaster* and *D. simulans* by using *D. yakuba* as an outgroup.

### 5. Calculating deltaSVM

We calculated the sum of weights of all 10-mers for ancestor sequence and focal sequence respectively. The deltaSVM is the sum of weights of the focal sequence minus the sum of weights of the ancestor sequence. A positive deltaSVM indicates substitutions increasing the chromatin accessibility in the focal sequence, and vice versa.

### 6. Generating Empirical Null Distribution of deltaSVM

Firstly, we counted the number of substitutions between each ancestor sequence and focal sequence. Then, we generated a random pseudo-focal sequence by randomly introducing the same number of substitutions to the ancestor sequence. Finally, we calculated the deltaSVM between the pseudo-focal sequence and the ancestor sequence. We repeated this process 10000 times to get 10000 expected deltaSVMs.

### 7. Calculating $p$ -value of deltaSVM

The  $p$ -value was calculated as the probability that the expected deltaSVM is higher than the observed deltaSVM. The  $p$ -value can be interpreted as the probability that the observed deltaSVM could arise by chance under the assumptions of the randomisation.

## **Estimate substitution rate**

The substitution rate, for example C → T, was estimated as the number of C → T divided by the number of nucleotide C in the ancestor sequence.

## **Definition of conserved and non-conserved enhancers**

We split stage-specific enhancers into two categories: conserved and non-conserved. A *D. melanogaster* TPi specific enhancer whose orthologous region in *D. virilis* overlaps at least

1bp with a *D. virilis* enhancer is defined as conserved. All other *D. melanogaster* TPI enhancers are defined as non-conserved.



## **Acknowledgements**

We thank the EMBL Genomics Core Facilities for support, and David Garfield and Gunter Wagner for critical reading of an earlier version of the manuscript. We thank members of the Furlong and Robinson-Rechavi labs for helpful discussions. Part of the computations were performed at the Vital-IT (<http://www.vital-it.ch>) Center for high-performance computing of the SIB Swiss Institute of Bioinformatics. EEF is supported by the Marie Curie EvoNet ITN and the DFG grant FU 750; JL and MRR are supported by Swiss National Science Foundation grant 31003A\_173048.

## **Author contributions**

EEF initiated the project, and supervised all experiments. RV, PK and JR performed all experiments. CG performed raw data analysis and DNase-seq peak calling. JL designed the detailed study with input from MRR. JL performed all downstream bioinformatics analyses. JL and MRR interpreted the results with input from all other authors. JL wrote the first draft of the paper. JL, EEF and MRR finalized the paper with input from all authors.

## **Competing Interests**

We declare that none of the authors have any competing interests.

## **Availability of data and materials**

Data files and analysis scripts are available on GitHub:

<https://github.com/ljljolinq1010/Chromatin-accessibility-evolution-during-Drosophila-embryogenesis>

DNase-seq data was deposited to EMBL-EBI ArrayExpress – the first three time-points published by Peng et al. (2019) with accession number E-MTAB-3797 (D. melanogaster and D. Virilis DNase developmental time course) and the new data for the last two time points in each species with accession number E-MTAB-9480.
