# Supplementary material for: The hourglass model of evolutionary conservation during embryogenesis extends to developmental enhancers with signatures of positive selection
Source: bioRxiv or medRxiv preprint supplement (doi:10.1101/2020.11.02.364505), 2021-04-23

# Peak counts

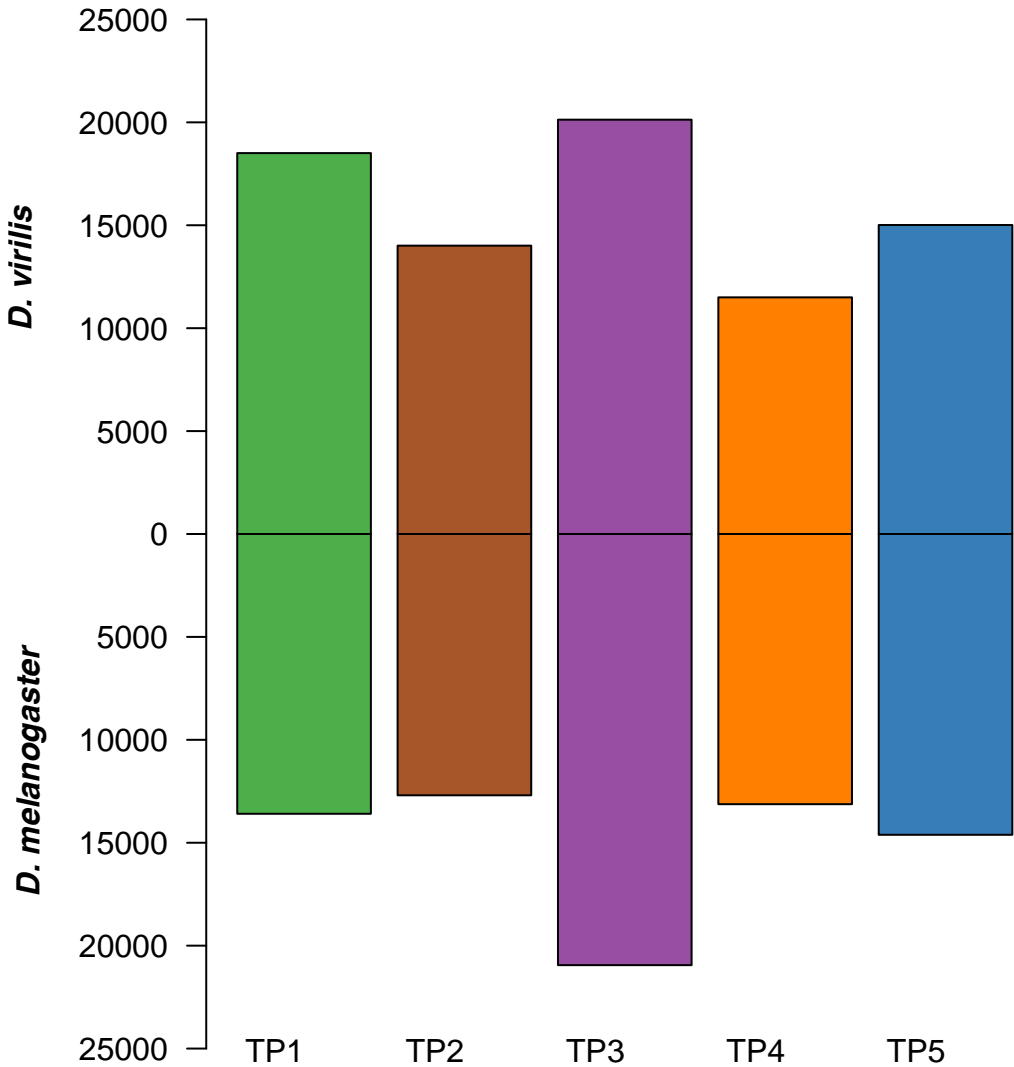

**Proportion of uniquely aligned enhancers  
(D.virilis to D.melanogaster)**

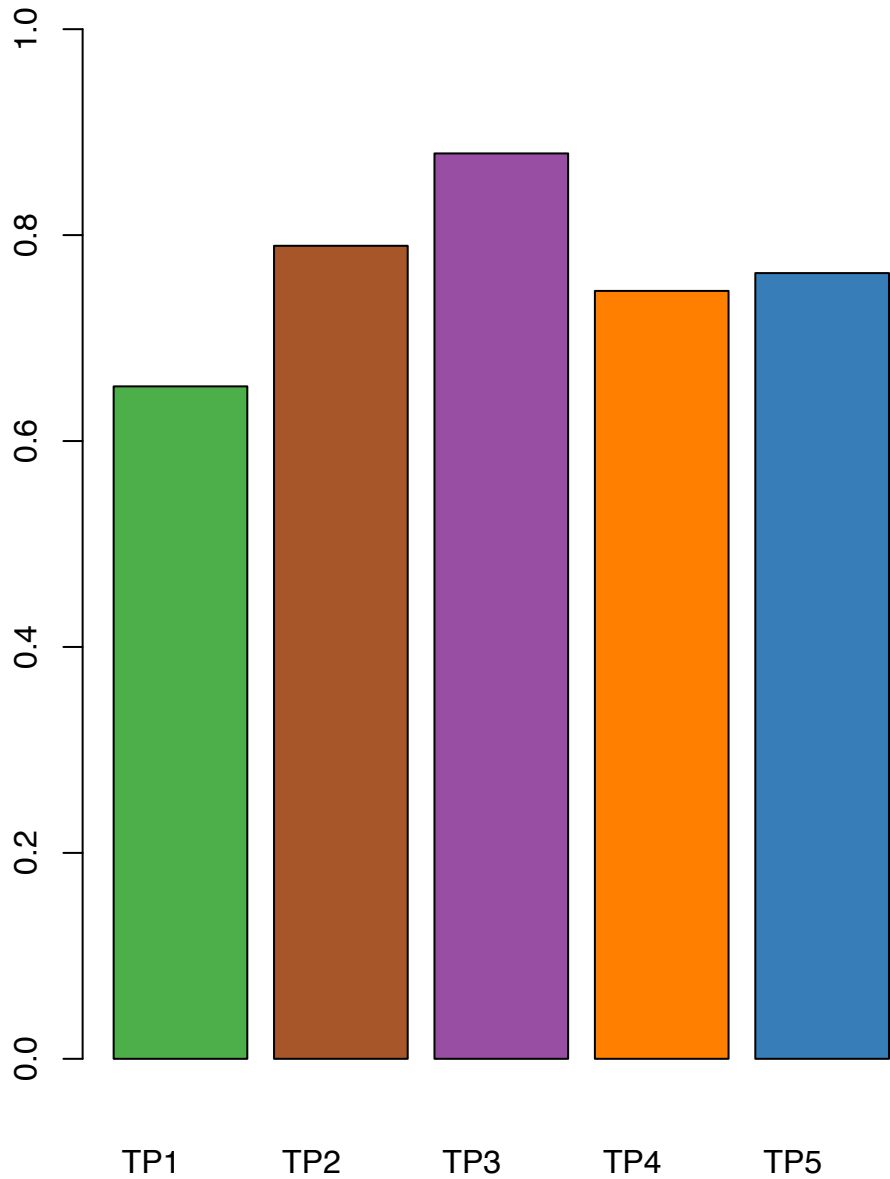

**Proportion of uniquely aligned enhancers  
(D.melanogaster to D.virilis)**

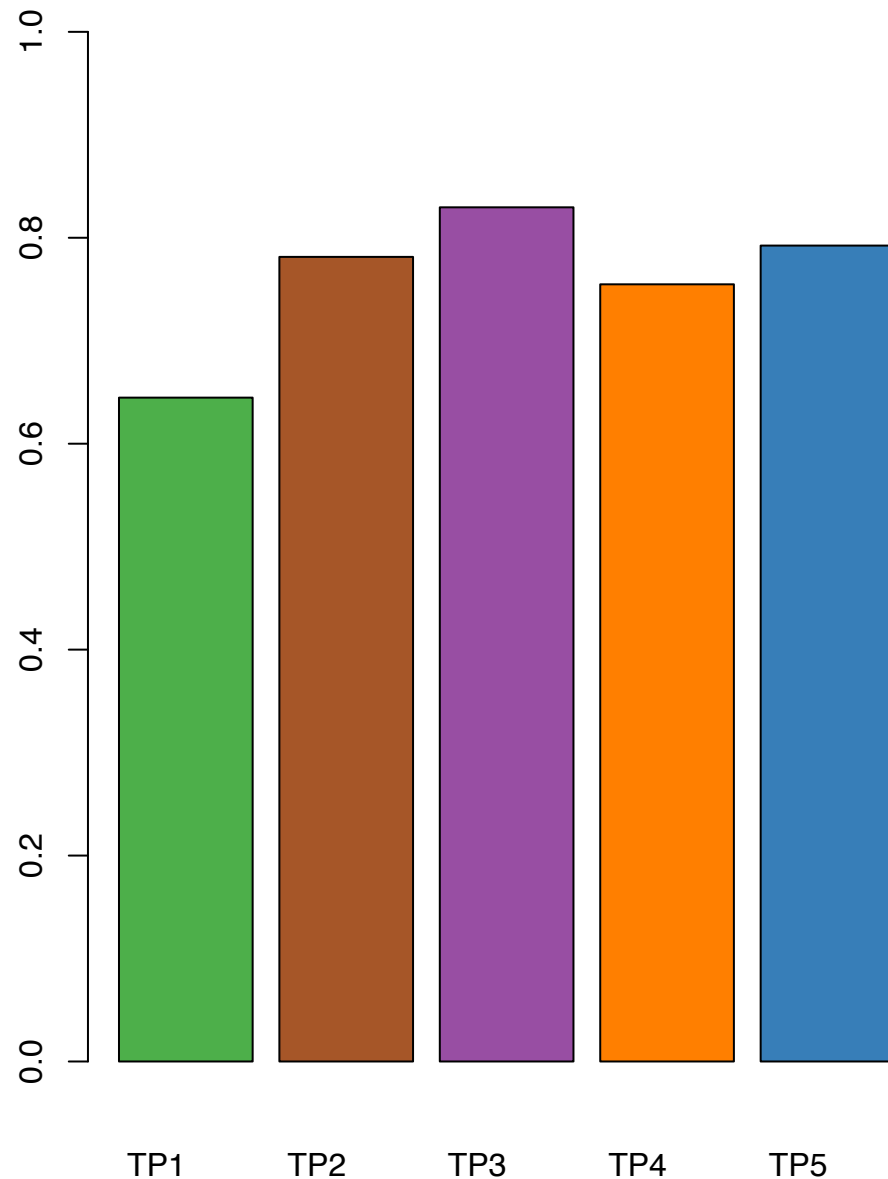

TP1

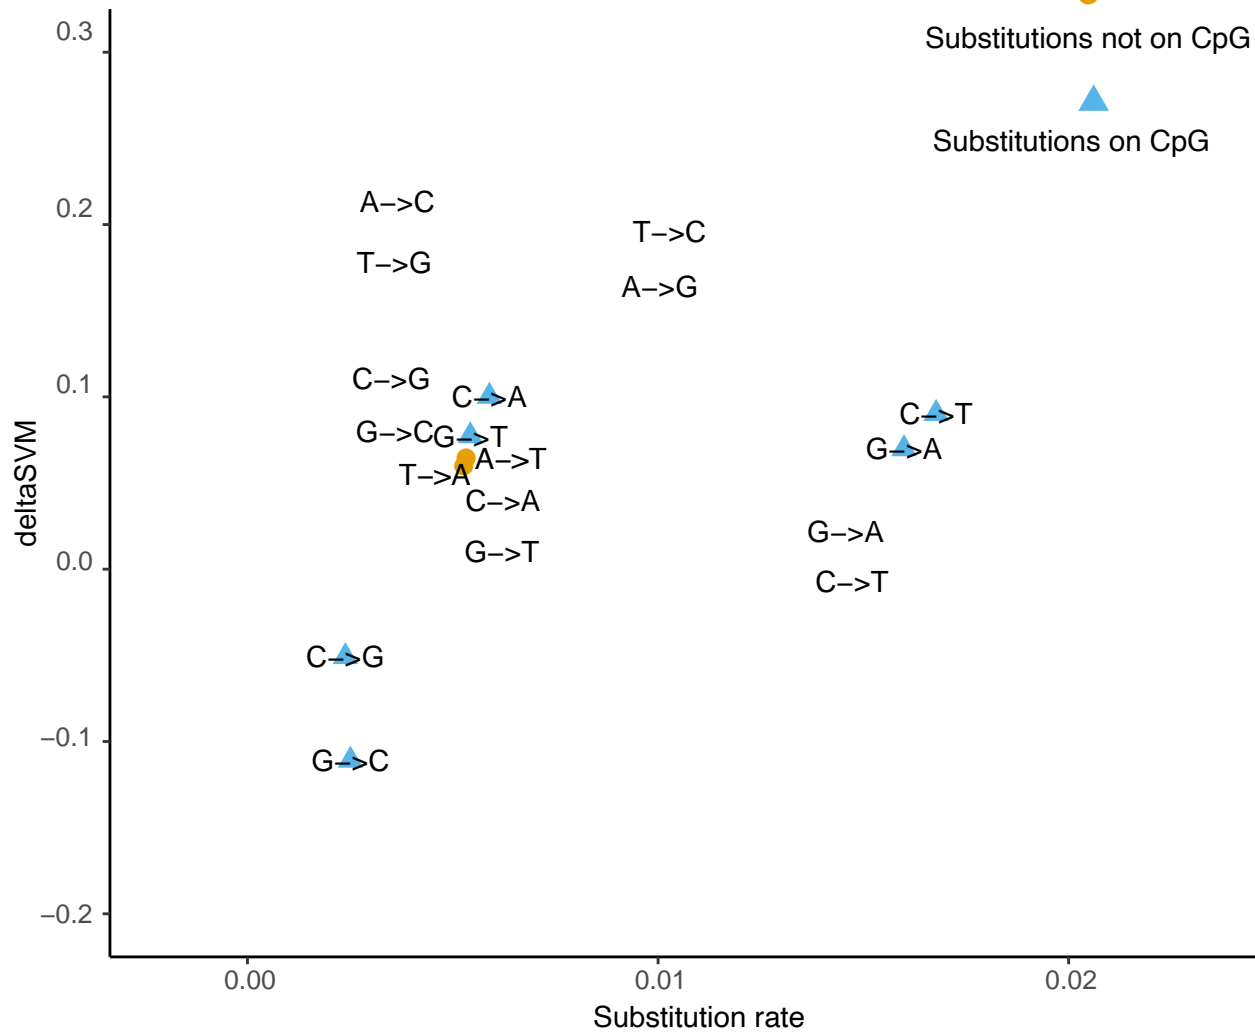

TP2

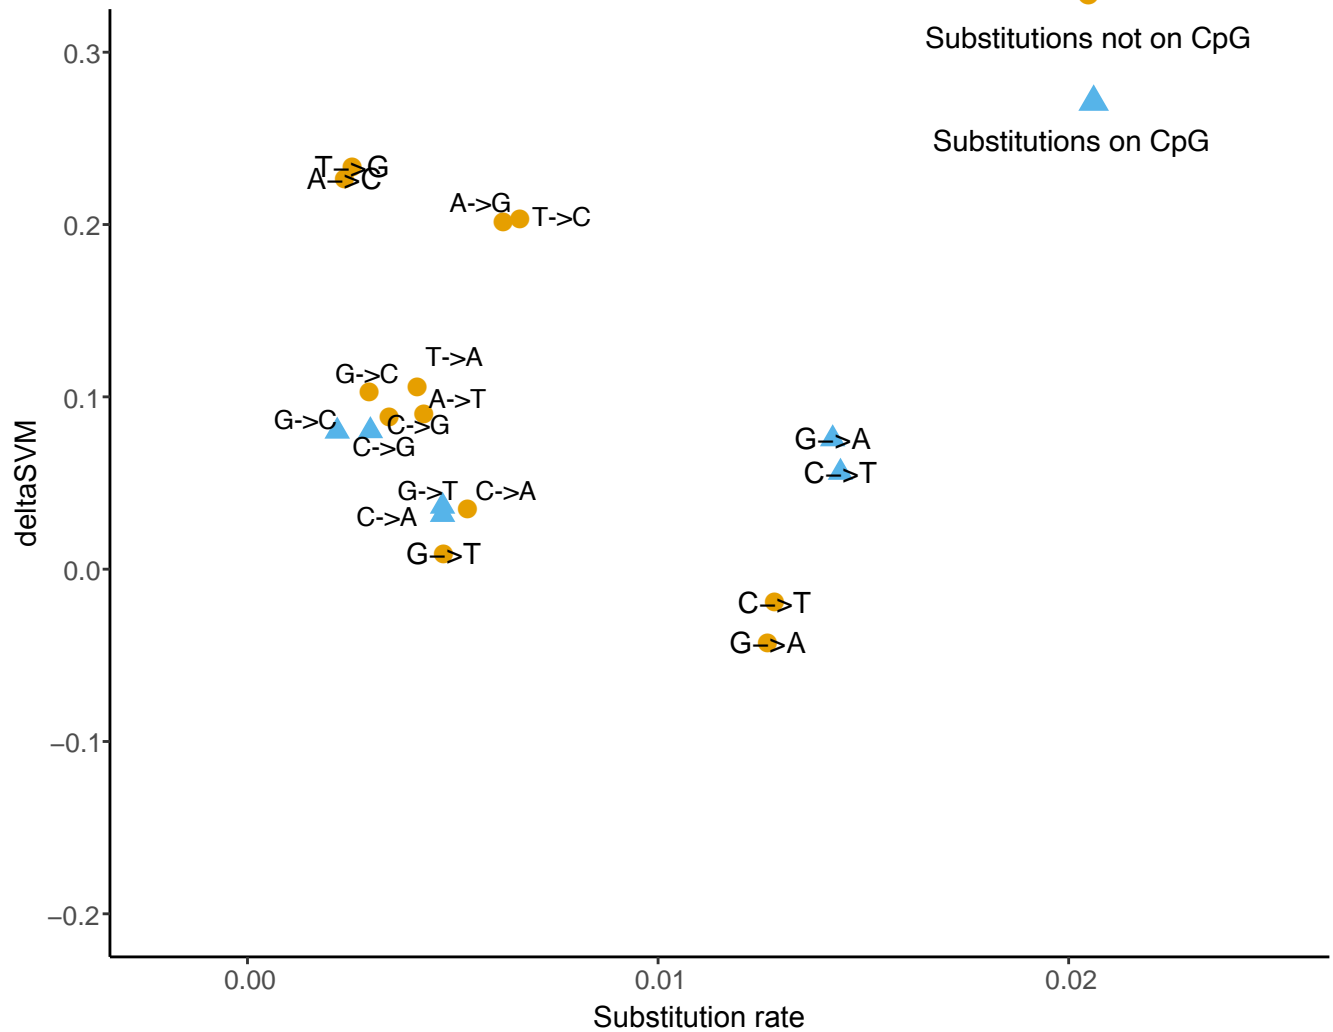

# TP3

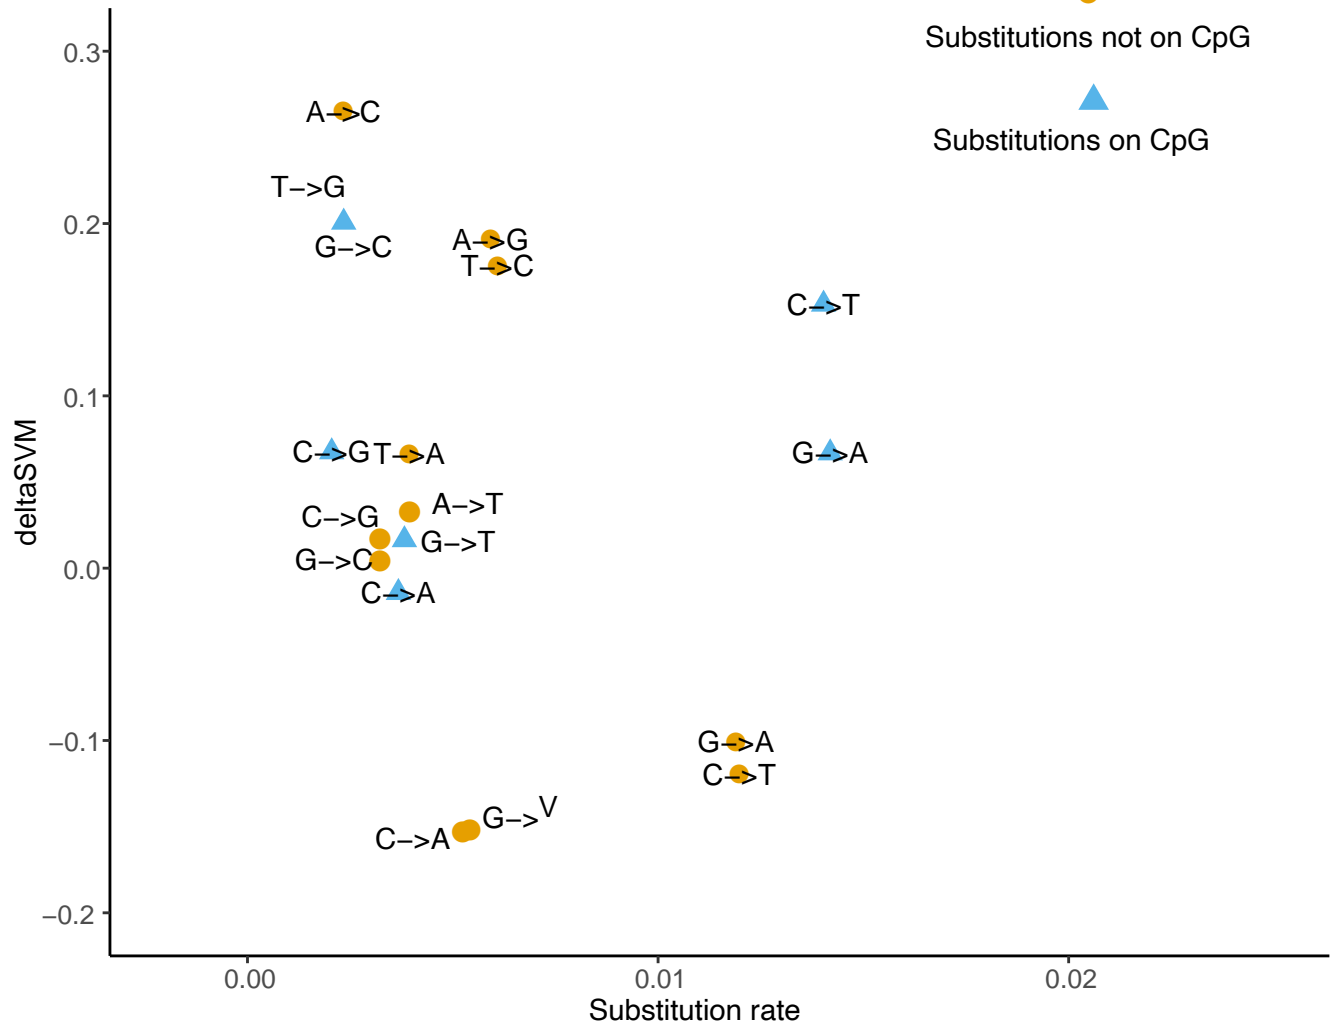

TP4

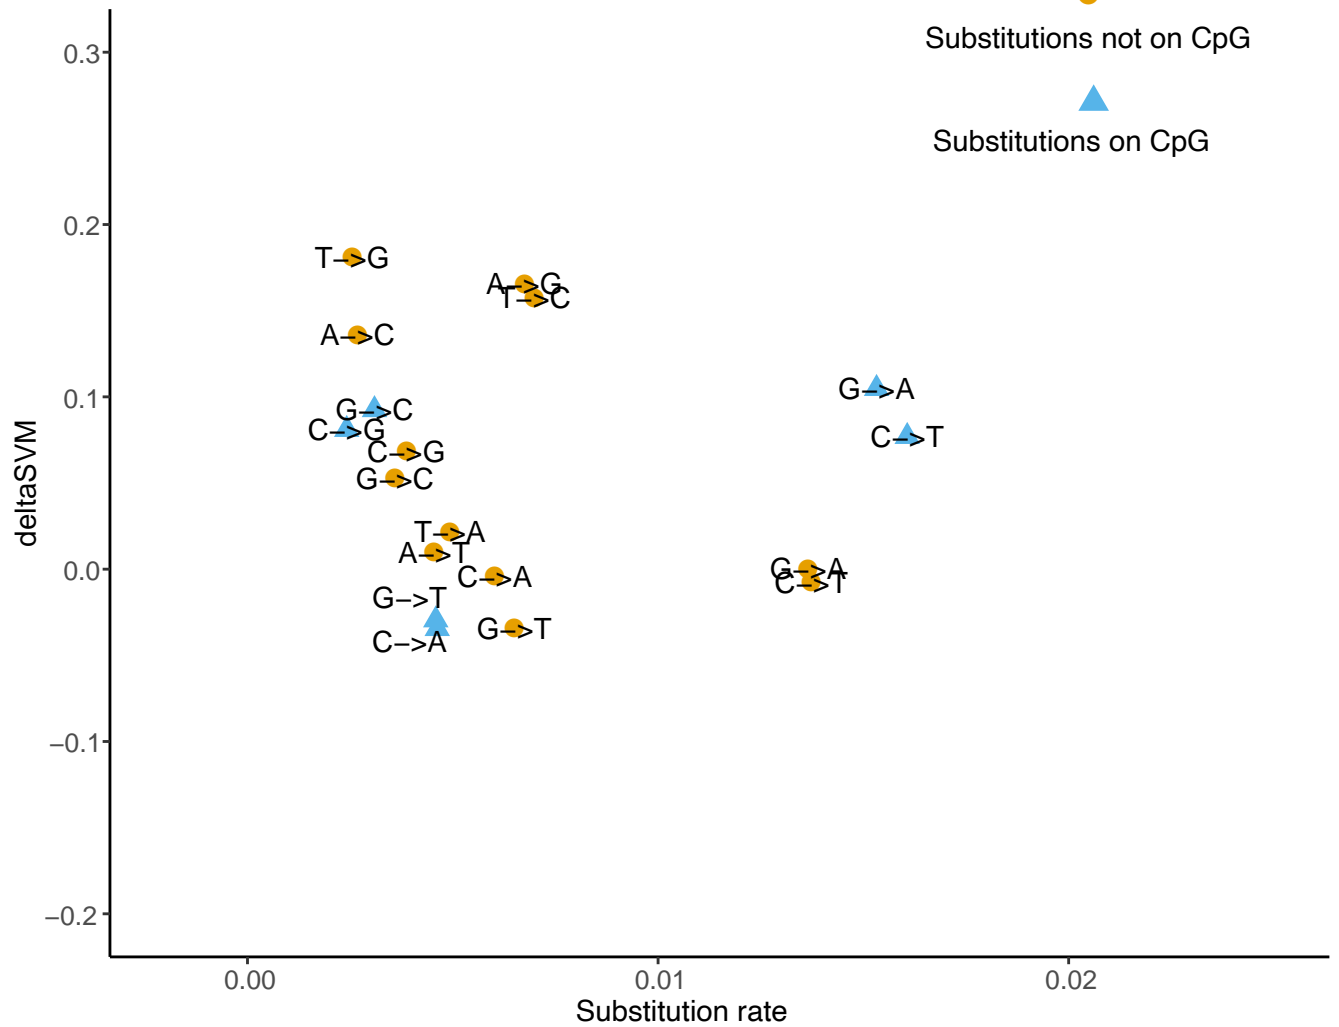

# TP5

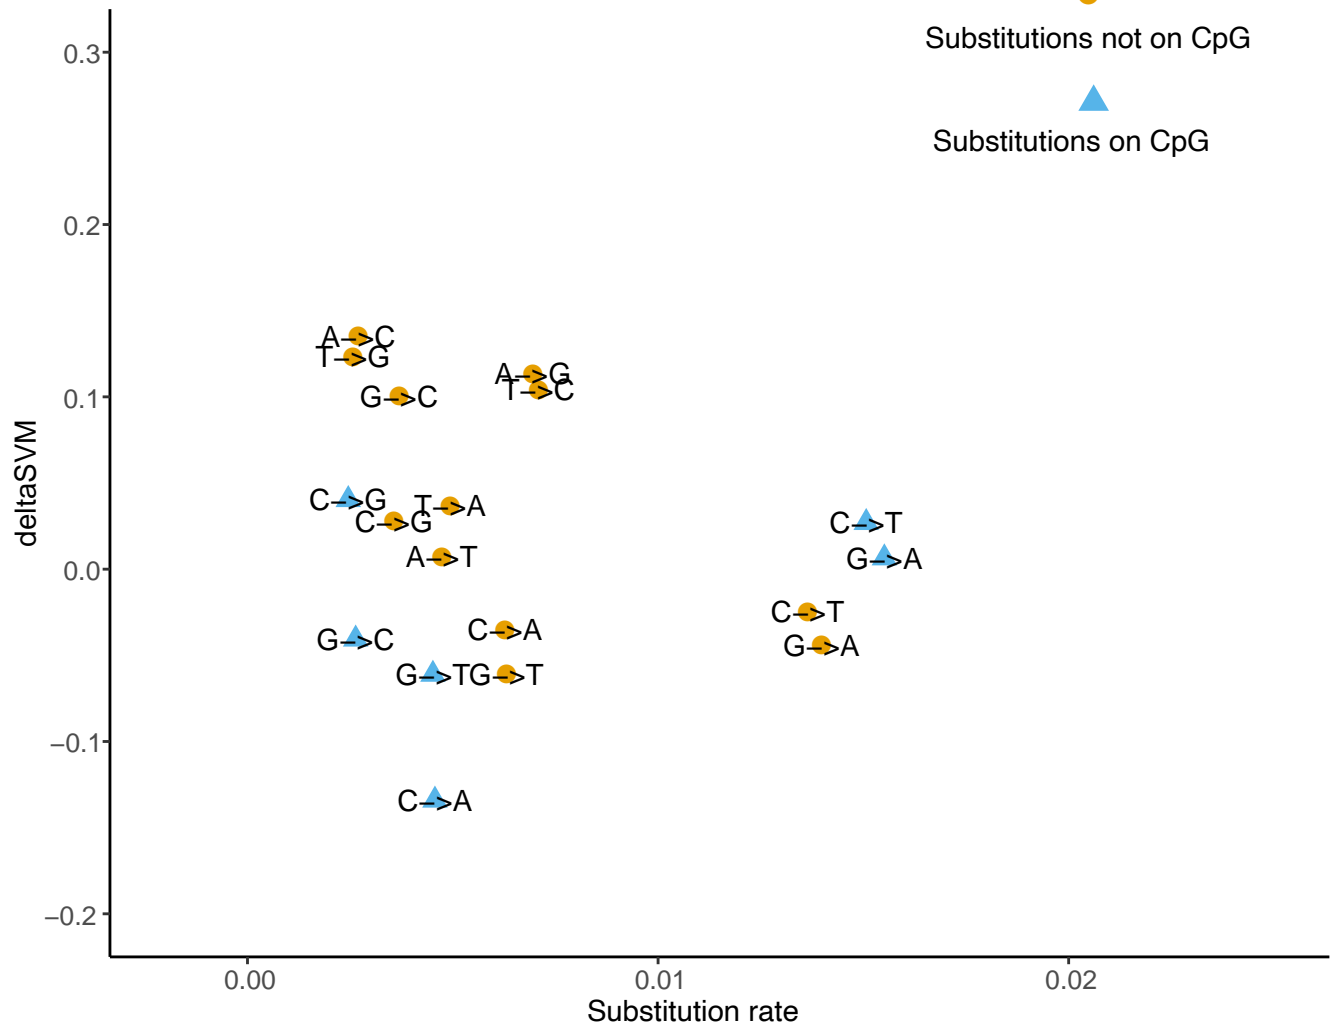

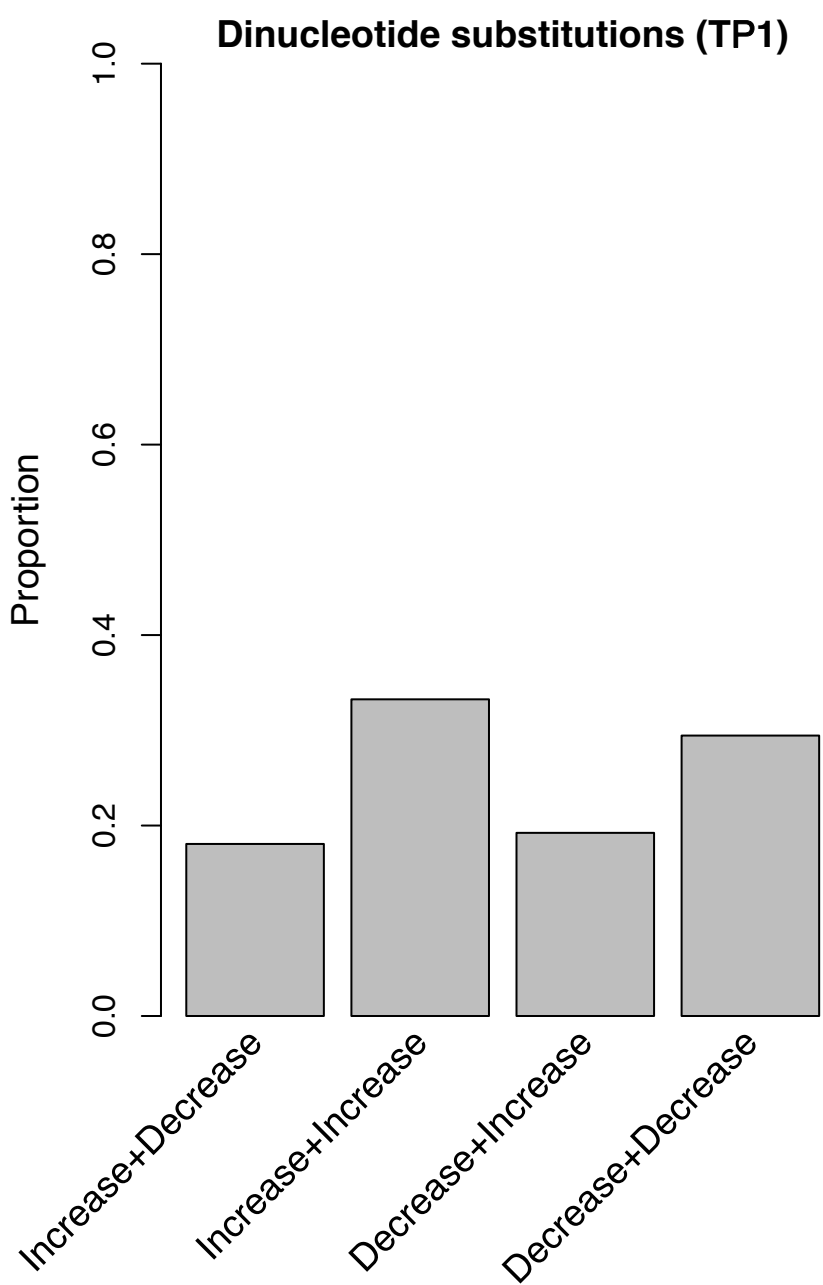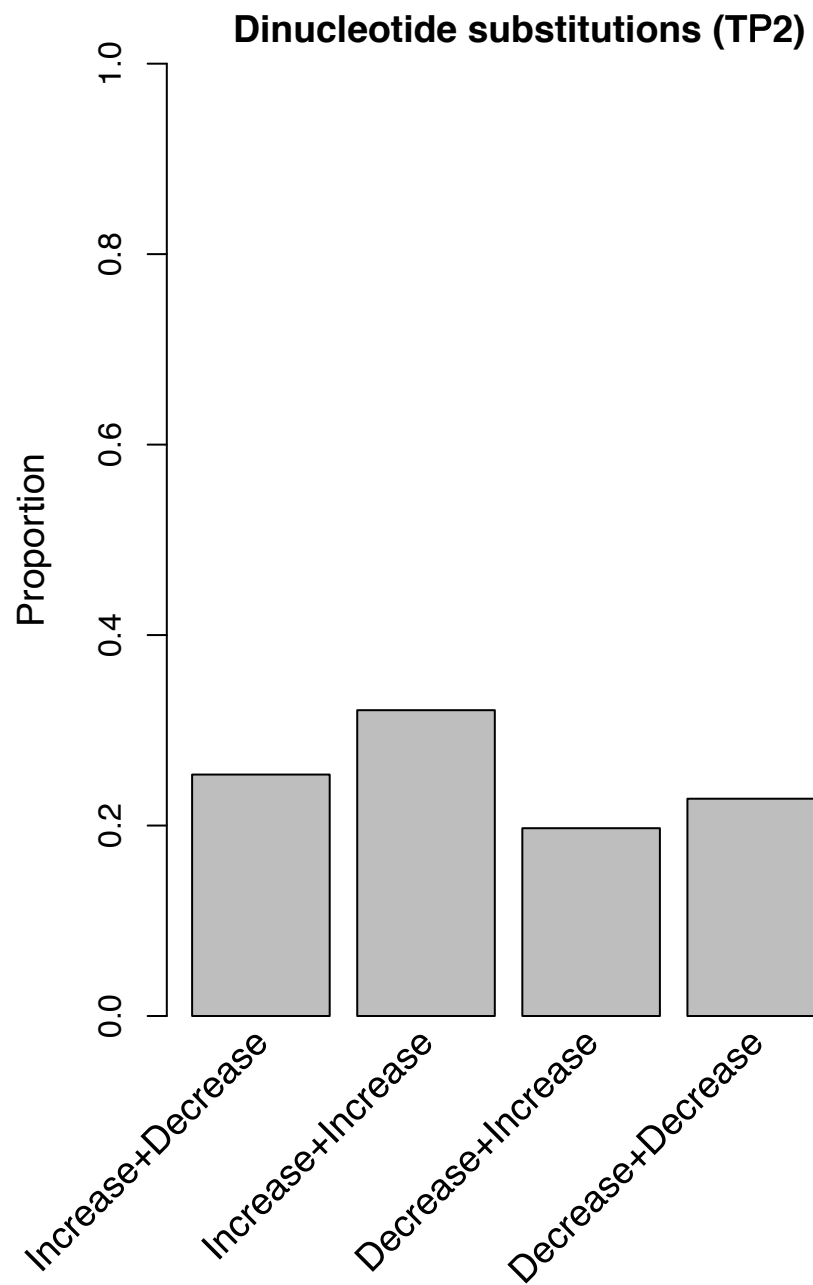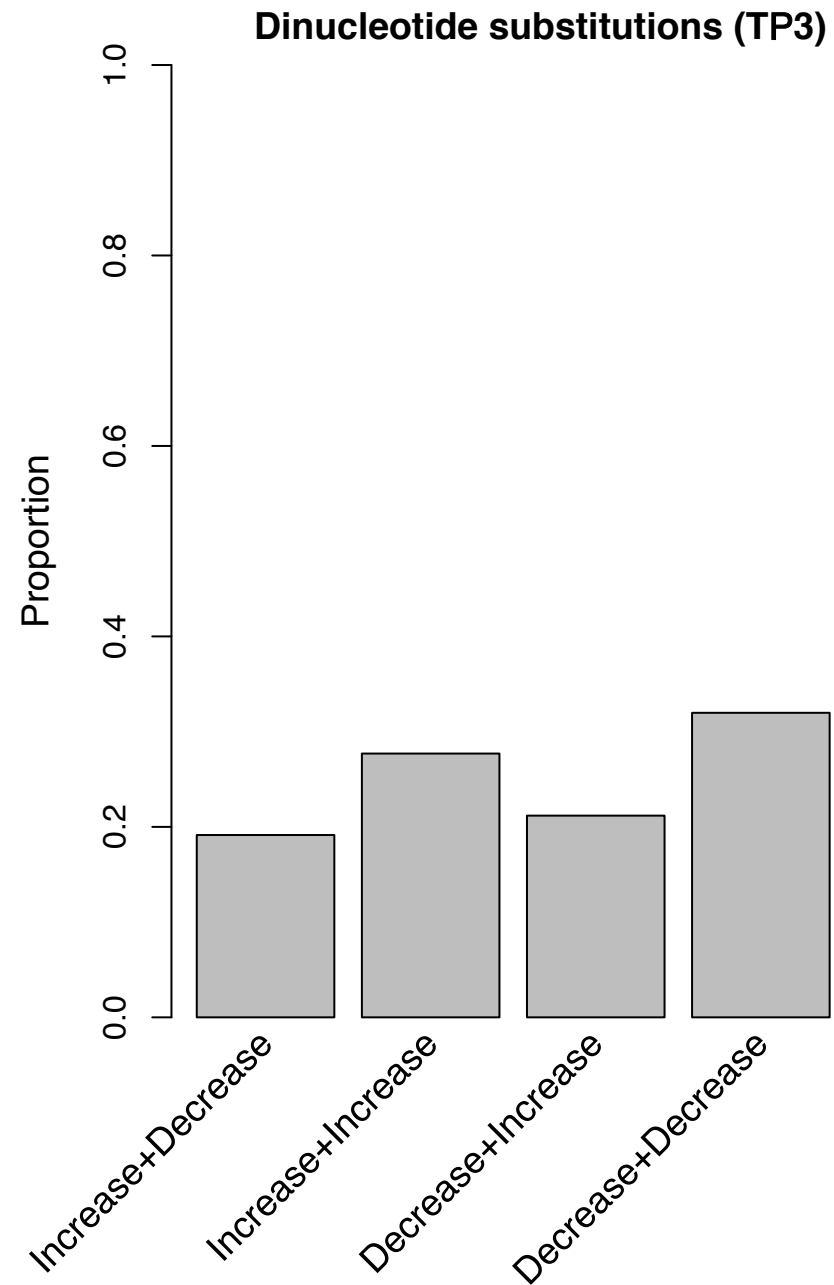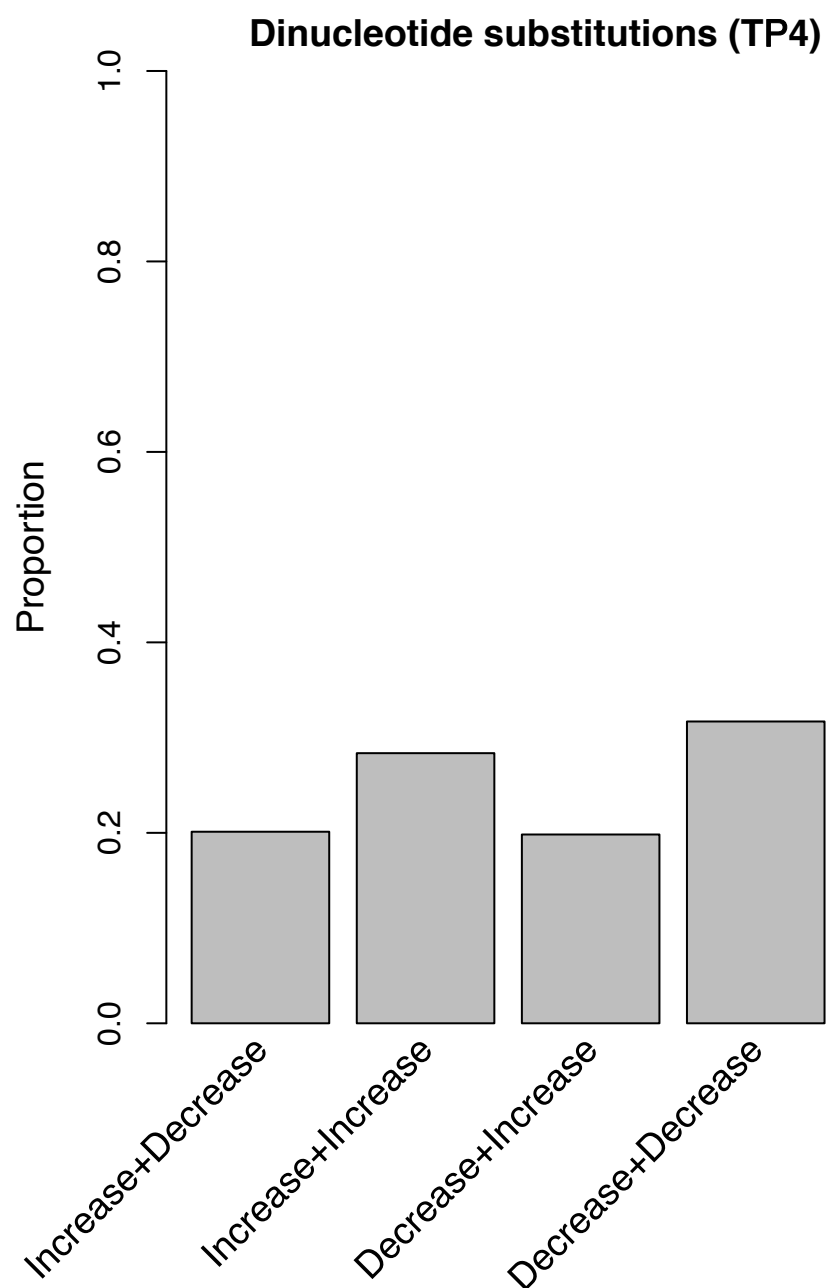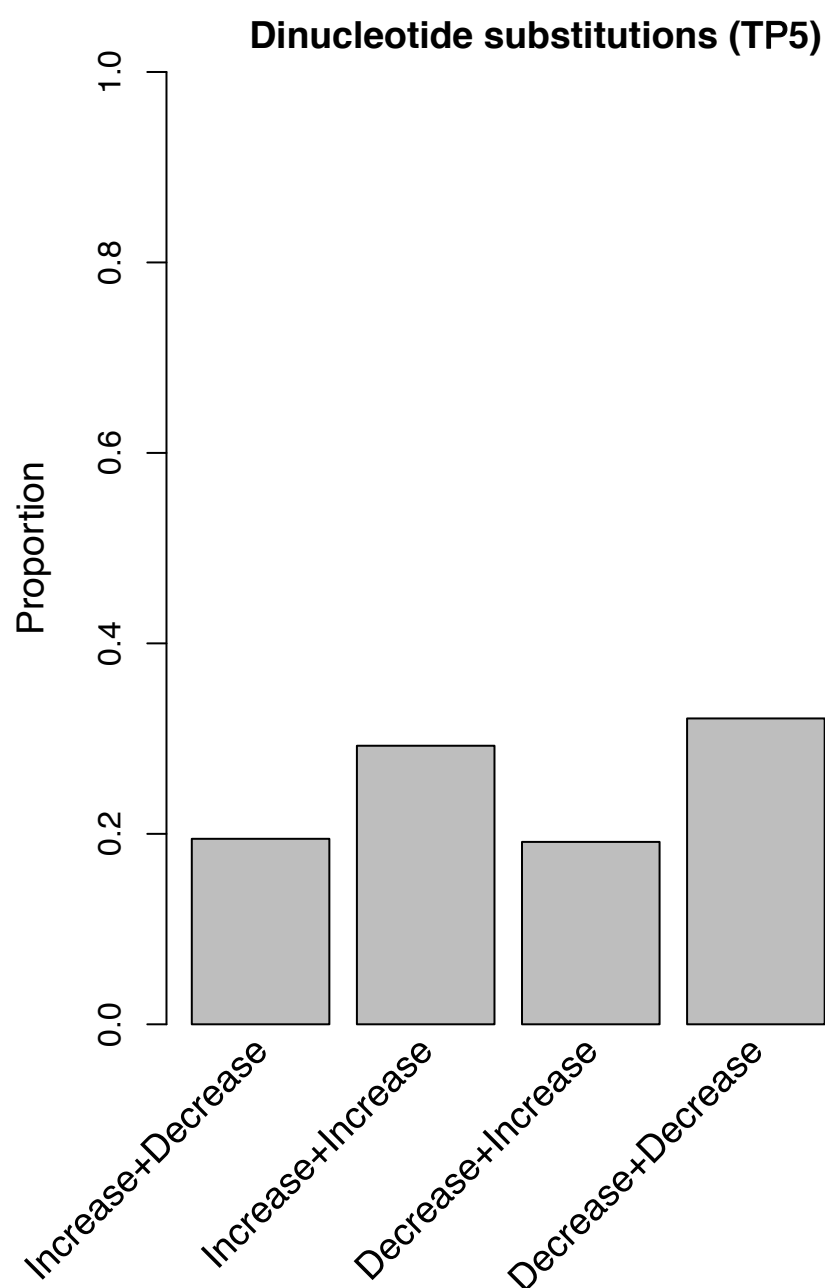



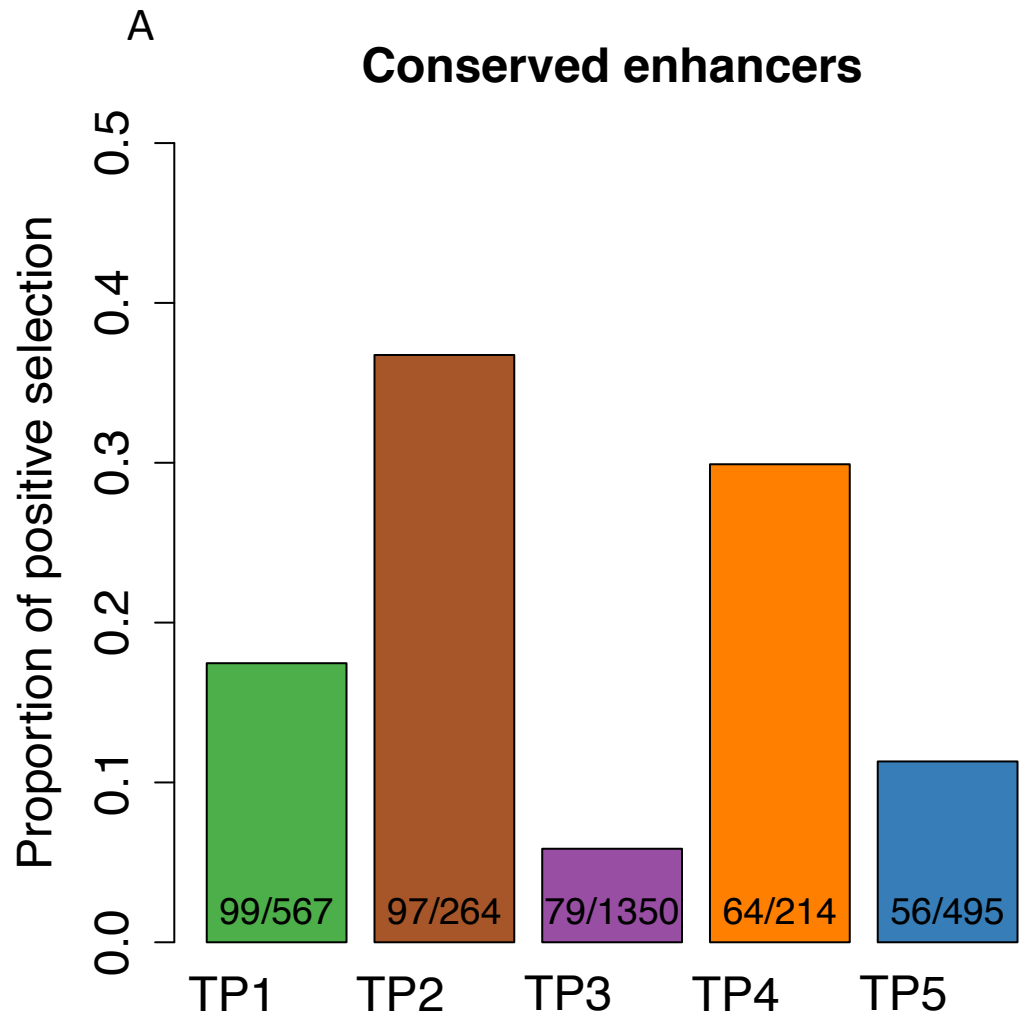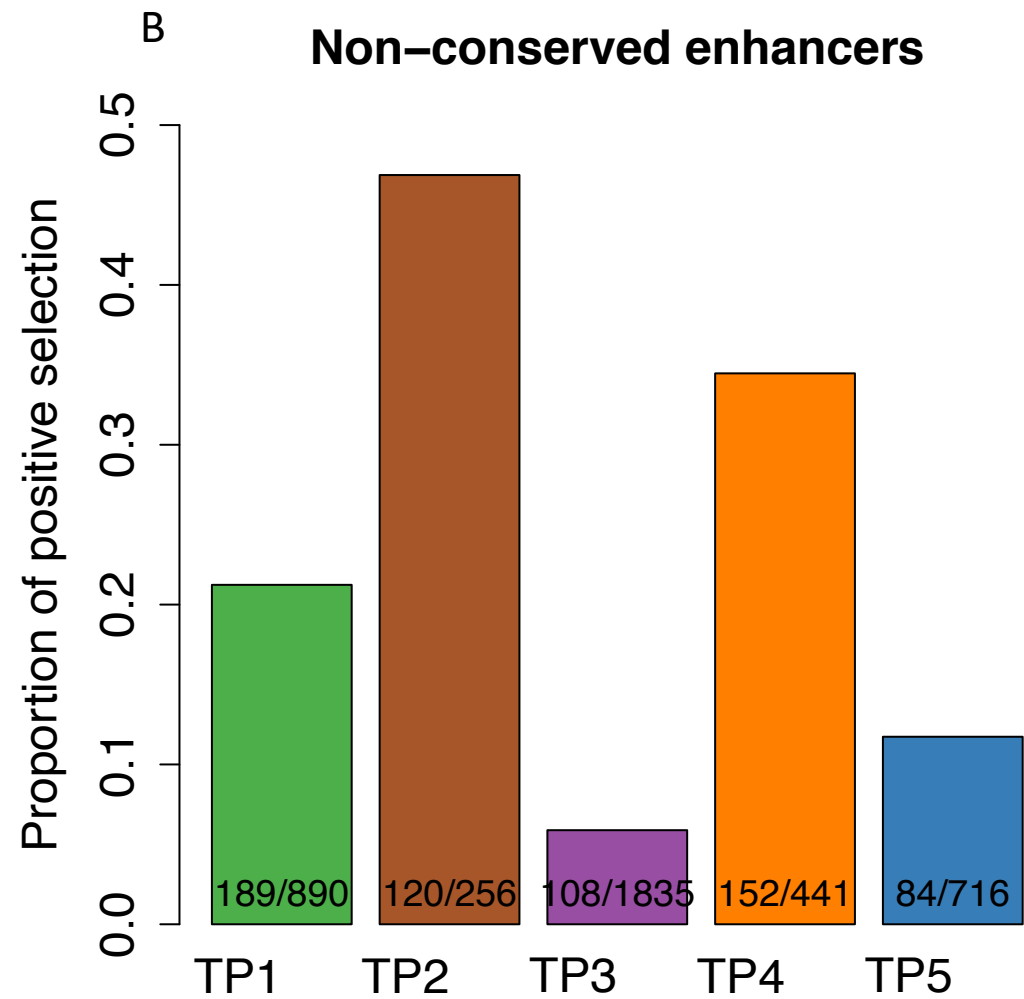

Supplement: Supplementary file [file media-1.pdf]
